1 **Developmental Single-cell transcriptomics in the *Lytechinus variegatus* Sea Urchin Embryo**

2

3 **Running title: Sea urchin embryo scRNA-seq**

4

5

6 **Abdull J. Massri<sup>1</sup>, Laura Greenstreet<sup>2,3</sup>, Anton Afanassiev<sup>2,3</sup>, Alejandro Berrio Escobar<sup>1</sup>,**  
7 **Gregory M. Wray<sup>1</sup>, Geoffrey Schiebinger<sup>2</sup>, and David R. McClay<sup>1\*</sup>**

8

9 1. Department of Biology, Duke University, Durham, NC 27708 USA

10 2. Department of Mathematics, University of British Columbia, 121 - 1984 Mathematics  
11 Road, Vancouver, BC, V6T 1Z2 Canada

12 3. Contributed equally to this work

13 \* Corresponding author ([dmcclay@Duke.edu](mailto:dmcclay@Duke.edu))

14

15

16

17 Address of Corresponding author:

18

19 Department of Biology, Box 90338

20 Duke University

21 Durham, NC 27708

22 USA

23

24 Phone: 1-919-812-3989

25 Email: [dmcclay@duke.edu](mailto:dmcclay@duke.edu)

26

27

28 **Key words:** Sea urchin embryo, scRNA-seq, gene regulatory networks, heterochrony, cell  
29 lineage

30

31

32

33

34

35

36

37

38

39

40

41

## 42 **Summary statement**

43

44 The early development of the sea urchin embryo was followed using scRNA-seq plus  
45 computational methods to trace lineage diversifications. These were matched to gene regulatory  
46 network changes over time.

47

48

## 49 **Abstract**

50

51 Here we employed scRNA-seq coupled with computational approaches to examine  
52 molecular changes in cells during specification and differentiation. We examined the first 24  
53 hours of development of the sea urchin *Lytechinus variegatus* (*Lv*) with 18 time points during  
54 which the embryo develops to the larval stage. Using Waddington-OT, the time points were  
55 computationally "stitched" together to calculate developmental trajectories. Skeletogenic cells  
56 displayed the expected immediate early divergence while other lineages diverged  
57 asynchronously, with many cells retaining an intermediate specification status until late in  
58 gastrulation. The *Lv*-scRNA-seq dataset was compared to the developmental Gene Regulatory  
59 Network (dGRN) model of specification in *Strongylocentrotus purpuratus* (*Sp*). 79 of 80 genes  
60 (98%) in that dGRN are present in the *Lv*-scRNA-seq dataset, and expressed in the correct  
61 lineages in which the dGRN circuits operate. Surprisingly, however, many heterochronies in  
62 timing of first expression of dGRN genes have evolved between the two species. Replotting the  
63 two dGRNs with precise attention to time of expression revealed a number of feedback inputs  
64 that likely buffer the dGRNs, allowing them to maintain function in the face of accumulating  
65 heterochronies.

66

## 67 **Introduction**

68

69 During the earliest stages of development, cells diversify through molecular specification,  
70 coordinate their spatial positioning, undergo directed cell rearrangements, and establish the basic  
71 body plan. Later development includes a massive increase in body mass while cells specialize

72 into tissues and organs. This sequence occurs rapidly, and with high fidelity. Errors are rare, and  
73 often catastrophic when they occur. At the same time, development is considered to be one of the  
74 major arenas for evolutionary change, thus raising the question of how development operates  
75 within a constrained, high-fidelity system and yet is subject to evolutionary change.

76

77 Emerging technologies provide increased leverage to address this question and to explore  
78 the complex nature of development. In particular, recent progress has been strongly augmented  
79 by high-throughput single-cell measurement technologies like single cell RNA sequencing  
80 (scRNA-seq), combined with analytical approaches to infer developmental trajectories in mouse  
81 and zebrafish embryos (Farrell et al., 2018; Schiebinger et al., 2019), as well in a growing  
82 number of embryos, tissues, and disease states (Cao et al., 2017; Fincher et al., 2018; Han et al.,  
83 2018; Karaïskos et al., 2017; Plass et al., 2018; Wagner et al., 2018). Due to the changing nature  
84 of development, and the cell's destruction during scRNA-seq protocols, it is only possible to gain  
85 a snapshot of a single cell's transcriptome. To measure temporal changes with scRNA-seq, a  
86 compromise solution to the snapshot issue is to capture cells at a series of timepoints that are  
87 relatively close together, then computationally stitch them together to infer a continuous  
88 sequence. It is important to assess whether the spacing of the timepoints is sufficiently close to  
89 allow the temporal change to be of value for mechanistic inference. If so, an ability to follow the  
90 lineage sequence enables the reconstruction of an atlas of transient cell states over time.

91

92 Among the questions in development that are a work in progress is that of cell fate  
93 specification. For two decades developmental Gene Regulatory Networks (dGRNs) that direct  
94 cells toward their fates have been studied in many embryonic systems (Peter and Davidson,  
95 2015). dGRNs of various model embryos are inferred or empirically established through iterative  
96 perturbations of candidate signals and transcription factors. These GRN models and the  
97 accompanying advent of systems biology revealed a number of molecular devices that govern  
98 network circuitry during the progression of cells through specification and commitment. Feed-  
99 forward and feedback circuits are among the transcriptional devices that advance and stabilize  
100 GRN states (Yeager-Lotem et al., 2004). These and many other regulatory mechanisms continue  
101 to be uncovered in many embryonic systems (Zhou et al., 2018). The architectural features of  
102 network circuits provide the functionality that lead to a cell fate and ultimately to tissue

103 assemblies. Changes in these circuits are hypothesized to be drivers of evolutionary  
104 diversification (Erkenbrack and Davidson, 2015; Erwin and Davidson, 2009; Hinman and  
105 Davidson, 2007; Hinman et al., 2003; Israel et al., 2016). Thus, exploration of GRNs by a  
106 powerful technology such as scRNA-seq, promises new insights to our understanding of how  
107 embryonic systems work, and evolve.

108

109 To begin using scRNA-seq for inference into regulatory analysis, a number of steps must  
110 be followed. A necessary step is to determine whether the depth of sequencing using this  
111 technology is sufficient to detect expression of the transcription factors and signals that  
112 constitute the specification networks. To explore that question we chose to analyze the sea urchin  
113 dGRN. Over the past two decades, a number of investigators experimentally assembled a dGRN  
114 of sea urchin embryo specification. Many perturbations of transcription factors and signals from  
115 multiple laboratories revealed a detailed network model that operates from fertilization until  
116 gastrulation (Davidson et al., 2002; McClay et al., 2020; Peter and Davidson, 2015). Recently,  
117 scRNA-seq was used to compile the first atlas of development for *Strongylocentrotus purpuratus*  
118 (*Sp*) (Foster et al., 2020), and that approach was further used to explore the development of  
119 pigment cells in *Sp* (Perillo et al., 2020). Given the extensive knowledge of dGRNs in the sea  
120 urchin embryo, and taking advantage of the methods for scRNA-seq developed for this model  
121 embryo (Massri, 2021; Perillo et al., 2020), our first goal was to establish whether the molecules  
122 in dGRNs were “visible” to scRNA-seq inquiries. We find that more than 98% of the molecules  
123 in the sea urchin dGRN are present in our scRNA-seq database, both in the lineages expected  
124 and at the times the dGRN models indicate those signals and transcription factors are present to  
125 guide specification. This gave us license to explore the dGRN further. We explored the cell  
126 lineages and their accompanying dGRNs using a recently developed computational tool  
127 “Waddington-OT” (Schiebinger et al., 2019). We also developed novel computational tools  
128 utilizing barycentric coordinates to follow lineage progressions and dGRN changes over time.  
129 The details of these dGRN and lineage findings are provided following a series of quality checks.  
130 These established that the atlas of cells produced is of high quality and accurately reflects cell  
131 lineage progression from zygote to larva.

132

133           The ability to follow each reconstructed lineage using scRNA-seq, supplied by thousands  
134 of gene expression patterns, provided an opportunity to explore novel properties of cell  
135 diversification. In some cases, the divergence was simple as suggested by a seminal asymmetry  
136 event. However, other lineage separations were gradual, implying a much more complex series  
137 of events necessary to finally resolve a cell type. Further, a comparison between *Lv* and *Sp*  
138 revealed a number of temporal changes in dGRN dynamics that have evolved during the 40 – 50  
139 million years since the common ancestor of these species. Despite those many changes, analyses  
140 revealed new stabilizing features of the dGRNs that likely contributed to the high degree of  
141 conservation of the dGRNs between the two species.

142

## 143 **Results**

144

### 145 **Atlas of sea urchin development from fertilization to larval stage**

146

147           The sea urchin embryo is a basal deuterostome that has long been a model for studies of  
148 early development. Its development to the larval stage is rapid, occurring in *Lv* within 24 hours.  
149 To map known GRN genes, and to identify novel candidates during this critical time period of  
150 embryonic development, we performed a scRNA-seq analysis using the 10x Genomics system.  
151 This standardized and reproducible advanced scRNA-seq platform yields relatively deep  
152 coverage of RNA expression in single cells at a cost that is not prohibitive (Massri et al., 2021;  
153 Perillo et al., 2020). Eighteen timepoints were collected, initially at hourly intervals and then  
154 during later stages at two to four hour intervals. Rather than process the same number of cells for  
155 each timepoint, we increased the cell number with increasing stages to cover the increased  
156 developmental complexity. To generate the number of embryos and biological diversity needed  
157 for the study, eggs from six females were fertilized by sperm from one male *Lv* sea urchin. At  
158 each time point approximately  $10^6$  embryos were dissociated to single cells and then fixed,  
159 using a published protocol we adapted (Alles et al., 2017; Chen et al., 2018; Juliano et al., 2014;  
160 Massri et al., 2021; McClay, 1986). Each time point separated cells from the embryo under  
161 conditions that minimally affected the mRNA expressed in each cell. The dissociated cells were  
162 immediately fixed under conditions that retained more than 95% of the resident mRNA per cell.  
163 Fixed cells were then rehydrated and counted before cell encapsulation and library preparation.

164 Following library preparation, samples were sequenced at >50,000 reads/cell to ensure read  
165 depth and coverage (Haque et al., 2017; Svensson et al., 2017; Ziegenhain et al., 2017).

166  
167 According to a standard analysis pipeline (Massri et al., 2021), we mapped reads to the  
168 Lv3.0 genome (Davidson et al., 2020), with the 10x Cellranger pipeline and filtered out low  
169 quality cells using Seurat (Butler et al., 2018; Stuart et al., 2019). In total 50,935 cells remained  
170 and were used for the analysis. We obtained a matrix of raw gene expression counts for each  
171 sample, which was normalized using SCTransform, a regularized negative binomial regression  
172 method that stabilizes variance across samples (Hafemeister and Satija, 2019), then visualized  
173 using UMAP (Uniform Manifold Approximation and Projection) (Becht et al., 2018). **Fig. 1**  
174 shows the requisite overview UMAP visualizations of these 50,935 cells. Diagrams of embryos  
175 at several stages of development (**Fig. 1A**), relate developmental states to hours samples were  
176 collected. The UMAP plot in **Fig. 1B** is colored according to 16 embryonic cell types that  
177 emerge during that 24 hr period. The colors match the cell types shown in the embryo diagrams  
178 of **Fig. 1A**. **Fig. 1C** shows the same UMAP colored to show the hours of collection. These colors  
179 match the dot colors shown in the time course diagram. Graph-based louvain clustering,  
180 implemented in Seurat, was used to obtain 63 distinct clusters of cells, and these were annotated  
181 using dGRN marker genes (Davidson et al., 2002; McClay et al., 2020; Peter and Davidson,  
182 2015), to provide a preliminary identification of the embryonic lineages. **Fig S1A** shows the  
183 major annotated lineages plotted over the 18 time points and **Fig. S1B** shows the 63 clusters. The  
184 dynamics of the temporal progression of stages is shown in **Movie S1**. The cells in the movie are  
185 colored to show the initiation, divergence, and progression of lineages as a function of time.

186  
187 The structure of the UMAP recapitulates the basic events of sea urchin development. It  
188 has long been established that the skeletogenic (or primary mesenchyme cells (PMCs)), and  
189 primordial germ cells (PGCs) branch from specification of the other lineages as early as the 4<sup>th</sup>  
190 and 5<sup>th</sup> cleavages by two successive unequal cleavages (McClay, 2011). The UMAP displays that  
191 separation, and provides a continuous track of the two lineages as they are specified over time. In  
192 addition, the endomesoderm later splits into the two canonical germ layers: endoderm and  
193 mesoderm. This is once again reflected in the UMAP plot since at 5 hours post fertilization (hpf),  
194 cells of both germ layers are clustered together indicating that the cells still have not yet

195 diversified. By 7-8 hpf the endoderm and mesoderm cells have separated, and later each further  
196 subdivides as diversification within the germ layers occurs. Meanwhile, specification of the  
197 ectoderm occurs leading to regional anterior-posterior, dorsal-ventral, and right-left differences  
198 in this lineage (**Fig. 1B**; **Fig. S1**).

199

200 As part of the quality control of the analysis, we asked whether the pipeline from embryo  
201 to sequencing output introduced any bias in the relative abundance of cells from each lineage.  
202 Based on earlier lineage analyses of embryos (Davidson et al., 1998; Logan and McClay, 1999;  
203 Martik and McClay, 2017), the distribution of cells allocated to ectoderm, mesoderm and  
204 endoderm appeared not to be biased by over- or under-selection once the lineages could be  
205 identified by genes expressed at 5 - 6 hpf (**Fig. S2**). Since allocation of cells to lineages was  
206 based on expression of all genes in a cell, prior to five hours the prevalence of maternal  
207 transcripts distributed to all cells dominated and prevented the lineages from being separately  
208 distinguished. At the 5 hour time point, lineage markers had emerged providing an imperfect  
209 approximation of lineages, and from 6 hpf until the larval stage, the expected number of cells for  
210 each lineage was present. At 6 hpf there were no cells in the non-skeletal mesoderm because at  
211 that time point this lineage had yet to emerge from the endomesoderm (shown in the endoderm  
212 lineage only).

213

214 We found that even relatively rare cell populations could be detected. Normally, four  
215 Primordial Germ Cells (PGCs) arise at 5<sup>th</sup> cleavage, later divide once, and at gastrulation migrate  
216 to the coelomic pouches without dividing further (Campanale et al., 2014; Voronina et al., 2008;  
217 Martik and McClay, 2015). Despite contributing a maximum of 8 cells per embryo, we detected  
218 PGCs at each time point, providing a continuous record of that lineage (**Fig. 1**, **Fig. S1**). Another  
219 rare cell type in the embryo are the cells that become serotonergic neurons. In *Lv* at the pluteus  
220 larval stage only 4-5 such cells are detected (Slota and McClay, 2018). Again, that rare cell type  
221 was detected (**Fig. S1B**), giving us confidence that our developmental reconstruction reflected a  
222 detailed and accurate representation of each lineage's transcriptional history over the first 24  
223 hours of development.

224

225 **Detection of molecules contributing to developmental gene regulatory networks**

226

227           We next sought to determine whether the samples were sequenced deeply enough to  
228 detect the transcription factors known to participate in specification of the lineages of sea urchin  
229 development. The data revealed that the scRNA-seq analysis faithfully reflected expression of  
230 known transcription factors in the network of each previously characterized lineage. We  
231 analyzed the expression of 80 transcription factors and signals from the endomesodermal and  
232 ectodermal dGRN models (Li et al., 2013; Peter and Davidson, 2015). We first determined that  
233 all but one gene in the dGRN models are present in the relevant lineages indicating that the  
234 scRNA-seq database can provide information on 98% of the known dGRN genes (the missing  
235 gene is *twist*, a short gene expressed at very low levels). 52 of those 80 genes are plotted in a  
236 quantitative dotplot shown in **Fig. 2**, and all 80 are shown in UMAP distributions in **Fig. S3A**  
237 and **S3B**. For some transcription factors known to be expressed at low levels, there was an  
238 expected reduction in the proportion of the cells of a lineage in which that transcription factor  
239 was detected by scRNA-seq. For example, *Snail* is a gene known to be lowly expressed where  
240 ever it is found (Cano et al., 2000; Wu and McClay, 2007; Materna et al., 2010). Predictably, the  
241 percentage of cells in which a *snail* sequence was reported (**Fig. S3B**), was small relative to  
242 detection of other transcription factors that were relatively abundant as quantified in **Fig. 2**.  
243 Nevertheless, even a gene such as *snail* could be followed in the lineage trajectories (**Fig. S3B**).  
244 We conclude that the scRNA-seq database has the sensitivity to examine the spatial and temporal  
245 patterns of expression of the vast majority of transcription factors and genes used in specification  
246 of embryonic cells, including, we suspect, transcription factors that contribute but are not yet  
247 included in the dGRNs.

248

### 249 **Inferring developmental trajectories with Waddington-OT**

250

251           We next sought to infer developmental trajectories and analyze the diversification of the  
252 various lineages, with the ultimate goal of identifying transcription factors regulating these  
253 diversification events. We applied Waddington-OT methods to connect the scRNA-seq data from  
254 different time-points and infer developmental trajectories (Schiebinger et al., 2019). Optimal  
255 transport connects cells sampled at one time point to their putative descendants at the next time-  
256 point in a way that minimizes differences in expression over all genes. The algorithm requires as



257 input an estimate of each cell's proliferative ability, which it uses to allocate each cell a certain  
258 number of descendants. Based on the concordance between observed and expected changes in  
259 abundances of each of the five primary lineages (**Fig. S2**), cell proliferation rates were assigned,  
260 and we ran Waddington-OT with the default parameter values (see Methods for details). The  
261 resulting output is a time-course of transport matrices connecting each pair of time-points. These  
262 matrices have a row for each early cell and a column for each late cell, and the  $i,j$  entry is  
263 interpreted as the number of descendant's cell  $i$  would have of type  $j$  at the later time-point.

264

265 We tested the quality of our inferred trajectories by demonstrating that we could  
266 interpolate the distribution of cells at held-out time points, as described in (Schiebinger et al.,  
267 2019). This was important as it established that our temporal resolution was sufficient to  
268 accurately stitch together cells from adjacent timepoints (**Fig. S4A**). In other tests this result was  
269 robust to downsampling cells or reads, moderate changes in parameter values away from the  
270 default settings, or to moderate perturbations to growth rates (**Fig. S4B-F**).

271

## 272 **Visualizing lineage diversifications**

273

274 To visualize the divergence of various lineages, the transport matrices compute, for any  
275 cell from an early time-point, the proportion of descendants that obtain various fates at later  
276 time-points. We developed a simple way to visualize these 'fate probabilities' for triples (or  
277 quadruples) of lineages in a triangular (or tetrahedral) plot (**Fig. 3; Movie S1**). The visualization  
278 employs barycentric coordinates to represent  $k$ -dimensional probability vectors in  $k-1$ -  
279 dimensional space. For example, suppose we wish to visualize the cells from 8 hpf according to  
280 their probability of giving rise to an ectodermal, endodermal, or 'Other' descendant at 20 hpf.  
281 We identify a vertex of the triangle for each of these possible fates, and position the cells  
282 according to their relative probabilities. Cells perfectly fated to obtain a single fate are positioned  
283 exactly at the corresponding vertex, while cells with indeterminate fates are positioned in the  
284 interior of the triangle. The very center of the triangle corresponds to cells that are equally likely  
285 to choose any of the three fates, and cells along an edge have zero chance of reaching the  
286 opposite vertex. **Fig. 3** illustrates examples of how selected pairs of lineages diverge in  $L_V$  over  
287 time. **Movie S1** shows a tetrahedron visualization of the divergence of four fates simultaneously,

288 in parallel with the progression of those same cells along the UMAP over time. These  
289 visualizations allow us to easily identify groups of cells with specific fate probabilities as they  
290 migrate towards the corners over time. Moreover, expression of individual genes or gene  
291 signatures can be visualized in these barycentric coordinates much in the same way as they are  
292 on a UMAP plot.

293

### 294 **Embryonic lineage diversification differences as seen using the transport matrices.**

295

296 Often textbooks in development indicate that cell diversification begins when a  
297 molecular asymmetry occurs before or just after cell division so that two progeny diverge toward  
298 alternative fates. The simplest of models describes a factor's asymmetric distribution driving the  
299 separation. Once an asymmetry is in place, the two lineages are modeled as going their separate  
300 ways from that time forward. An example of this type of divergence in the sea urchin occurs at  
301 the fifth cleavage at the vegetal pole when skeletogenic cells diverge from the fates of other  
302 cells. During that 30 min cleavage cycle, skeletogenic cells activate *pmar1*, a repressor that  
303 represses a repressor, *hesC* (Revilla-i-Domingo et al., 2007). All other lineages in the embryo fail  
304 to activate *pmar1*. As a consequence, *hesC* is activated in all non-skeletogenic cells during that  
305 30 minute interval. This results in repression of the skeletogenic fate in those lineages. **Fig. 3C**  
306 shows the consequence of that diversification. At all time points, cells destined to become PMCs  
307 follow one side of the triangle, the side leading to the PMC fate.

308

309 However, cell fate decisions are not always so simple and clear. **Fig. 3D** shows the  
310 diversification of the endomesoderm. There, the endomesoderm ancestors diverge as a wave of  
311 cells spanning the distance across the triangle and that wave continues to spread through time  
312 until cells at later time points reach their eventual fates. In contrast to the skeletogenic cells in  
313 **Fig. 3C**, many cells tend to remain in an intermediate state until late in specification. Then, much  
314 later, as the cells near the time of differentiation, the wave parts, sending cells toward one of the  
315 two fates (see Movie S1 for an animated depiction of this sequence). This outcome indicates that  
316 the fate decision is both non-uniform temporally, and often quite late, even though the cells are  
317 continually specified (the wave progression). Further, the broad distribution of cells in the wave  
318 between the two final fate points suggests that the specification is variable in a lineage for much

319 of the time allowing for many of the cells to go either way until late in the temporal progression.  
320 We will return to this intermediate state below, but first it is necessary to assess the concordance  
321 between the scRNA-seq temporal profiles and the known dGRNs.

322

### 323 **Matching cell diversification to developmental GRNs**

324

325 Since we had established that 98% of the transcription factors and signals in the dGRN  
326 are present in the scRNA-seq database, we wanted to determine how well the expression of those  
327 genes matched the lineages established with the optimal transport method. If the plots of cell  
328 populations over time reveal when fates of the cells are decided, as inferred above, the  
329 Waddington-OT platform should identify populations of cells that correlate with the dGRN states  
330 established experimentally. If that were the case, cells in specification space should reflect the  
331 dGRN progression. To test that prediction we examined collections of cells that had diverted  
332 toward their final fate by a defined probability. **Fig. 4** shows two populations, one predicted to  
333 become skeletogenic cells, the other, endoderm. The red cells in **Fig. 4A** are predicted to become  
334 skeletogenic cells with better than 60% probability (at 6 hpf), while **Fig. 4B** indicates at 9 hpf,  
335 yellow cells predicted to become endoderm with a 60% probability. The gray cells in each  
336 triangle of **Fig. 4A and B** are all “other” cells that are not projected (at the 60% level) to become  
337 PMCs or endoderm respectively, though some of those cells may have reached the 60%  
338 threshold for an alternative fate. Next to the triangle plots are the position of those same cells in  
339 the UMAP plots.

340

341 **Figs. 4C and 4D** show BioTapestry (Longabaugh et al., 2009) dGRN models of  
342 skeletogenic cells and endoderm cells at the same times as shown on the Triangle and UMAP  
343 plots. To ask how well the red skeletogenic or yellow endodermal cell populations matched the  
344 dGRNs at those times, the ratios of gene expression between red:grey and yellow:grey were  
345 determined and a list of the 200 genes with the highest relative ratios was established. The idea  
346 behind the ratios was that if the cells predicted to become skeletogenic cells accurately reflected  
347 specification, those ratios should include dGRN signature genes for that fate with a high ratio  
348 relative to alternative fates. We went through the top 200 lists at several time points to ask how  
349 many of the genes in the skeletogenic or endoderm dGRNs, at the times in question, were present

350 in the top 200 ratio lists (**Tables S1-S4**). **Figs. 4C and 4D** show the match between dGRN state  
351 at the time points in question, and the genes on the lists. The BioTapestry models show in bold,  
352 genes that are in the top 200 lists. Approximately 71% and 73% of the transcription factors,  
353 (modeled at the 6 hpf and 9 hpf times) are present in the top 200 gene lists for the two cell types.  
354 This high level of concordance suggests that the optimal transport approach is useful for dGRN  
355 inference, and therefore, that other transcription factors that have ratios highly favoring a  
356 selected population at this time point are excellent candidates for inclusion in the dGRN model,  
357 and should be tested. The remaining genes in the two dGRNs were in the total lists of genes in  
358 cells of the two cell types but were not in the top 200 list. This is because the top 200, based on  
359 ratio of expression, did not include broadly expressed genes ( $\beta$ -catenin, TCF, Otxa), or dGRN  
360 genes that were also expressed at a high level in another tissue at that time (Blimp1, eve). Thus,  
361 while the ratio comparisons do not perfectly predict GRN assignments, they provide a very good  
362 predictor of tissue specific genes, and since those lists include large numbers of genes with  
363 unknown function in the embryo, they also provide an excellent list of candidate genes for future  
364 study.

365

### 366 **Uncommitted “intermediate” cells in the triangle plots express multiple gene signatures.**

367

368 To test the hypothesis that the intermediate cells of **Fig. 3** could be directed toward either  
369 of the two nearest fates, we developed a “gene signature” of each cell type using the well  
370 described developmental gene regulatory network (dGRN) for the sea urchin as our guide. The  
371 prediction was that if the cells were, in fact, intermediate, they should express members of both  
372 endoderm and NSM dGRNs. Using signatures of mesoderm and endoderm dGRN transcription  
373 factors that drive specification of mesoderm or endoderm (**Fig. S5**), we computationally sampled  
374 the specification state of all cells in the middle of the triangles. Cells were colored according to  
375 their expressed signatures as they progressed through specification. **Fig. 5** shows the results of  
376 that experiment. If a cell expressed only one of the two signatures it tended toward a dark blue  
377 color and hugged the edge of the triangle leading to one of the two fates (or if neither signature,  
378 it was closer to the “other” fates, i.e. ectoderm and PMCs). The cells in the middle and the cells  
379 in the “wave”, by contrast, were colored green or yellow-green or yellow, indicating that both  
380 signatures were present (pure yellow indicated a 1:1 ratio of signature genes expressed in a cell).

381 These data support the hypothesis that in separation of endomesoderm into mesoderm and  
382 endoderm, some cells proceed early toward a distinct fate, but other cells express transcription  
383 factors of both fates for an extended time, and only commit toward one or the other fate with an  
384 extended delay. It should be noted that the position of the cells is not based just on expression of  
385 the signature genes. That position, as with all the triangle plots, is based on expression of all  
386 genes of a cell and the position is established according to the optimal transport method  
387 described above. The coloring of the cells in **Fig. 5**, however, is based on the expression of  
388 signature genes in cells at those positions. To further test the hypothesis, we randomly sampled  
389 individual cells at different positions along the “wave” of intermediate cells to determine which  
390 genes of the two signatures were present. Did they simply retain a specification state more like  
391 the earlier endomesodermal ancestral state, or, did they express some transcription factors that  
392 normally appear once the mesoderm and endoderm diverge? **Fig. S5** shows the results of seven  
393 sampled cells (labeled pink). In 6 of the 7 cells signature transcription factors or markers of both  
394 mesoderm and endoderm were present. Cells halfway between the two fates tended to express  
395 both signatures equally. Cells closer to one of the two vertices tended to express a larger number  
396 of the signature genes closer to the nearby vertex than the other. One cell, the cell closest to the  
397 mesoderm vertex, expressed only mesoderm signature genes.

398

399 This observation is important as it illustrates that many cells of the mesoderm and  
400 endoderm spend extended time in an intermediate specification state before they become  
401 committed to one or the other fate. That decision occurs not as a consequence of a single event,  
402 as was seen with skeletogenic cells, but likely as a consequence of multiple inputs. Further, we  
403 sampled plots as late as 16 hpf and there were still intermediate cells expressing genes of both  
404 signatures, though by that time most cells had moved to a likely committed state.

405

#### 406 **Timing of gene expression compared between two species**

407

408 We next turned to a temporal analysis of transcription factor expression in the dGRN.  
409 Previously, a number of molecular heterochronies (changes in the relative timing of gene  
410 expression) were observed between distantly related sea urchins (Wray and McClay, 1988). A  
411 more recent analysis revealed that the skeletogenic lineage of those two species had much in

412 common, though there was some rewiring of the network nodes (Erkenbrack and Davidson,  
413 2015). With a vastly improved temporal resolution now available, we examined the timing of  
414 gene expression between *Lytechinus variegatus* (*Lv*) and a relatively closely related species,  
415 *Strongylocentrotus purpuratus* (*Sp*). A published high-resolution time-course of gene expression  
416 is available for most of the genes in the *Sp* dGRN generated using the nanostring platform  
417 (Materna et al., 2010). We adapted the Waddington-OT approach to determine timing of first  
418 expression of dGRN genes along lineage trajectories (Schiebinger et al., 2019) (see methods for  
419 details).

420

421 Transcription factors begin to function well before the steady state of their expression is  
422 reached (Bolouri and Davidson, 2003). Thus, a measure of first expression of a transcription  
423 factor provides an approximation of when it is deployed in a dGRN (assuming a built-in lag is  
424 present). Accordingly, we recorded the earliest expression for 49 of the transcription factors and  
425 signals used in early specification and included in the dGRNs for *Lv* and *Sp*. The scRNA-seq  
426 approach provided a precision that was unavailable to the earlier nanostring analysis (Materna et  
427 al., 2010), because the scRNA-seq profiles allowed us to track individual lineages (**Figs. S1,S3**),  
428 while the *Sp* nanostring approach analyzed expression in whole embryos. Thus, if more than one  
429 lineage expressed a gene, the nanostring analysis was unable to distinguish from the data which  
430 cells were being measured. Fortunately for that analysis, many of the dGRN genes are expressed  
431 in only one lineage (as revealed by in situ RNA hybridization) during the time frame covered by  
432 the dGRNs. With the caveat that not all the data for *Sp* genes is reported in a lineage specific  
433 manner, we compared the timing of expression between the two species where a clear  
434 comparison was possible. **Fig. 6** and **Table S5** show the time of first expression for 49 genes in  
435 the dGRNs that could be compared between the two species. The rate of development for *Lv* is  
436 approximately twice as fast as *Sp* since *Lv* is cultured at 23°C while *Sp* is cultured at 15°C. The  
437 two-fold timing difference contributes to rate of cleavage, arrival at canonical stages, and we  
438 expected that the same would be true for the timing of first expression of GRN genes. Thus, if a  
439 gene in *Lv* was expressed at 3 hpf, the expectation was that the same gene should be expressed at  
440 6 hpf in *Sp*. A variance of two or more hours from that expectation was scored as a heterochrony.

441

442           Of the 49 dGRN genes examined (**Fig. 6** and **Table S5**), 15 are maternally expressed in  
443 both species and thus scored as having conserved earliest expression (e.g., *Tel* and *Tbr*). A  
444 further five dGRN genes are not maternally expressed and the timing of their earliest zygotic  
445 expression is conserved within a particular embryonic territory or cell lineage (e.g., *gcm* and *dri*).  
446 However, the majority of dGRN genes (37/49) exhibit heterochronic zygotic first expression  
447 within at least one territory of their expression, and in some cases to a substantial degree (e.g.,  
448 *smo* and *hh*). Of note, the earliest expression of 4 genes shifts between maternal and zygotic  
449 (*HesC*, *hex*, *myc*, and *scl*). Finally, some dGRN genes show conserved expression within one  
450 territory of the embryo but heterochronic expression within another. For instance, the timing of  
451 *blimp1* expression is conserved in the endomesoderm but heterochronic in the primary  
452 mesenchyme.

453  
454           Several observations are pertinent. The heterochronies are scattered throughout  
455 specification times and differ in sign and magnitude, so there is no “hotspot” or obvious pattern  
456 to the temporal shifts. Heterochronies were also observed in each germ layer, indicating that they  
457 are spread throughout the dGRN rather than being restricted to a single cell lineage. Note that  
458 **Fig. 6** is plotted to show heterochronic shifts of *Lv* relative to *Sp*, but the actual polarity of the  
459 evolutionary change is not known (i.e., a given heterochronic shift could have occurred in the  
460 lineage leading to either *Lv* or *Sp*). It may be possible to reconstruct the polarity of some shifts  
461 based on scRNA-seq datasets from additional sea urchin species. The number of dGRN genes  
462 that showed fairly substantial heterochronic shifts in critical regulatory genes raises questions  
463 regarding the robustness of dGRNs. With so many evolutionary differences in timing of  
464 expression, how is it possible for the dGRNs of these two species to exhibit such an apparently  
465 high level of conservation in expression of cell-type specific genes, as well as similar outcomes  
466 in response to perturbation experiments? This prompted us to further examine the timing of  
467 expression relative to the architecture of the dGRNs in the two species.

468

### 469 **Temporal architecture of the dGRNs**

470

471           Given the temporal differences we noted in the *Sp* vs *Lv* comparison, we decided to  
472 revisit both the *Sp* and *Lv* data and use timing of expression as a driver of the model to see if that

473 had an effect on GRN structure. Our rationale is that timing of expression helps in the analysis of  
474 dGRN function. For example, if gene A is perturbed and as a consequence gene B is no longer  
475 expressed, the conclusion is that Gene A somehow directly or indirectly drives the expression of  
476 Gene B. If timing is considered, however, Gene A could drive Gene B in a forward direction, or,  
477 the same perturbation also could be explained by Gene A feeding back to influence expression of  
478 Gene B which was expressed earlier, in a direct or indirect feedback mechanism. Experimentally,  
479 distinguishing between these two possibilities in constructing circuits often is difficult, but if  
480 relative timing of expression of Gene A vs Gene B is known, it is possible to infer directionality  
481 of control. Further, since we observed so many heterochronic changes, we wondered whether  
482 these would influence feedforward or feedback controls. We thus decided to examine the GRNs  
483 of *Sp* and *Lv* to compare the timing of dGRN assembly and explore how timing might influence  
484 developmental and evolutionary circuitry.

485

486 The temporal modifications to the dGRNs were drawn without changing the results of the  
487 earlier perturbation studies in which gene A was shown to regulate gene B. After making the  
488 connections, if Gene A, which was known to provide an input into Gene B, was expressed later  
489 in time than Gene B, we noted that direct or indirect feedback input with a bold connection line.  
490 The most recently published *Sp* dGRN has 12 such feedback inputs. After redrawing all *Sp* and  
491 *Lv* dGRNs, (**Fig. S6A-D**) several observations are relevant. The temporally adjusted dGRN  
492 models differ significantly in structure from the most recent versions of the *Sp* dGRN (Li et al.,  
493 2013; Peter and Davidson, 2015). Of importance, when time of first expression is considered,  
494 there is an increase in the number of feedback inputs relative to the original dGRNs. In other  
495 words, there are a number of cases (highlighted in the GRN models) in which a gene expressed  
496 later has a feedback input into a gene that is expressed earlier. Further, there are substantial  
497 differences in the *Sp* and *Lv* dGRNs when the two are compared side by side (**Fig. S6A-D**).

498

499 There are about 232 connections in the networks. Not counting inputs in which a gene  
500 feeds back on itself, the four dGRNs of *Sp* contain a total of 46 feedback inputs (19.8% of the  
501 total number of connections), while the four of *Lv* contain 43 (18.5% of the total). It is well  
502 established that feedback can stabilize a network (Brandman and Meyer, 2008), especially  
503 negative feedback circuits. As a result of the redrawing of the networks, there are 11 negative



504 feedback inputs in *Sp* and 9 in *Lv* (**Fig. S6**). Thus it is likely that the capacity for networks to  
505 absorb heterochronic changes is at least in part buffered by the presence of these stabilizing  
506 feedback loops.

507

## 508 **Gene ontology (GO) enrichment**

509

510 Much of this analysis has been devoted to examination of the scRNA-seq results in  
511 comparison with a large body of knowledge on establishment of dGRNs during development.  
512 Many other analyses are possible and promise to be most informative. The database supporting  
513 this analysis will be publicly available for anyone with ideas to explore. As one example of  
514 where such analyses could lead, analysis of enrichment of gene sets between clusters of cells  
515 (**Fig. 1**) can reveal molecular processes that are characteristic of a given cell lineage in the  
516 embryo. We used Mann-Whitney U Tests to investigate GO term enrichment within each  
517 lineage, based on the percentage of cells expressing a given gene among the most differentially  
518 expressed genes within each lineage. The enriched GO terms in some cases match known  
519 biological features. For example, ectodermal lineages are highly enriched for expression of genes  
520 involved in cilia movement, microtubule processes, and regulation or response to stress.  
521 Similarly, clusters composed of cells that are dominated by maternal transcripts are enriched for  
522 genes involved in cell cycle processes and regulation of chromatin organization (**Fig. S7**). This  
523 analysis also provides insights into additional, less obvious genes that may be involved in  
524 distinct cellular functions. For instance, skeletogenic cells are enriched for “regulation of  
525 anatomical structure size”, providing potential candidate genes for future experimental analysis  
526 aimed at understanding how growth of the larval skeleton is regulated.

527

## 528 **Discussion**

529

530 The ability to gain new insights through scRNA-seq has been demonstrated in several  
531 model embryo systems (Farrell et al., 2018; Foster et al., 2020; Schiebinger et al., 2019; Tintori  
532 et al., 2016). Here, we learned that a high quality scRNA-seq analysis detects almost all of the  
533 known transcription factors in a well-established dGRN. This is important because dGRNs  
534 underlie the specification of all lineages as development progresses, and it is of value to know

535 whether scRNA-seq has the power to assist in further dGRN discovery. Our results demonstrate  
536 that once fate specification begins, the sample from each time point contains the expected  
537 distribution of cell types, based on published cell lineage analyses. Given that, the 50,000 cells  
538 from 18 densely spaced time points enabled us to employ Waddington-OT to trace lineage  
539 trajectories and divergences. The optimal transport method was then used to follow temporal  
540 profiles of cell fate specification, and to address several unanswered questions related to gene  
541 regulation in development. It was of great value to have a well annotated, high quality genome in  
542 order to produce gene calls with high fidelity (Davidson et al., 2020). With these quality checks  
543 complete, we built on Waddington-OT (Schiebinger et al., 2019) to devise a number of novel  
544 computational analyses. Methods were developed to assess timing of first expression of genes  
545 within a lineage, and to follow cell fate probabilities based on the optimal transport methods. We  
546 had started the analysis with the simple goal of determining how much of the known dGRN was  
547 reflected in the scRNA-seq database. When we confirmed that 98% of the genes in the dGRN are  
548 detected and readily quantifiable, we then explored the database to assess a number of properties  
549 of the dGRN. Further, and looking toward the future, the high degree of concordance between  
550 the scRNA-seq database and several comparisons with the dGRNs gave us confidence that the  
551 datasets contain, in addition to the known dGRN genes, highly selective candidates for inclusion  
552 in future studies of molecular progression toward distinct fates, not only for adding transcription  
553 factors, but also for effectors that participate in morphogenesis or a number of biological  
554 processes (**Fig. S7**).

555  
556 Lineage analyses have provided prominent milestones in the advances of developmental  
557 biology over the past 120 years. The careful camera lucida tracings of Conklin pioneered  
558 descriptions of cell lineages in *Styela* and *Crepidula* (Conklin, 1897, 1905). Innovative  
559 transplantation methods were used to trace lymphatic and neural crest origins (LeDouarin and  
560 Jotereau, 1973), setting the stage for detailed analyses of how neural crest lineages diverge and  
561 contribute to diverse structures in vertebrates. The epic dedication to lineage tracing in *C.*  
562 *elegans* (Sulston and Horvitz, 1977; Sulston et al., 1983), provided the anchor diagram for all  
563 lineages and provided the control state for mutational analyses affecting many cell types. More  
564 recently, approaches featuring novel methods for fluorescently labeling cells (for example,  
565 “brainbow” (Livet, 2007; Pan et al., 2011)), have led to many recent lineage tracing advances.

566 The optimal transport approach offered by Waddington-OT adds another valuable tool to this  
567 endeavor by allowing detailed reconstruction of the sequence of molecular changes that take  
568 place within cell lineages. This approach is unbiased, taking into account all genes expressed  
569 rather than considering only the transcription factors that characterize the distinct state of a cell  
570 at a given time. These transcription factors are represented in the data (**Fig. 4**), and can be  
571 tracked to the lineage probabilities, but many other genes contribute to the transcription state of a  
572 cell at a given time point during specification and differentiation. Thus, optimal transport offers a  
573 powerful new approach for analysis of developmental events that are known to occur at specific  
574 times in a lineage, both at the level of gene regulation and at the cellular level in studies of  
575 morphogenesis.

576  
577 The divergence of cells from an uncommitted state to distinct fates is at the core of  
578 developmental and stem cell biology. The literature contains a number of examples in model  
579 systems where a single molecular event directs a lineage divergence (Driever and Nusslein-  
580 Volhard, 1988; Guo and Kemphues, 1995; Kemphues et al., 1988; Nishida and Sawada, 2001;  
581 Nusslein-Volhard and Wieschaus, 1980). Those examples, including the skeletogenic cell  
582 divergence in the sea urchin embryo, mentioned above (Oliveri et al., 2002; Oliveri et al., 2003;  
583 Revilla-i-Domingo et al., 2007), tend to occur early in development. We were curious about the  
584 other mode of divergence seen in this study, an asynchronous and an apparent delayed  
585 commitment displayed by several of the lineages. This divergence from a common ancestral state  
586 appears messy, with many cells seemingly uncommitted to their final fate until quite late (**Figs.**  
587 **3, 4**). We selected embryos from cultures that were developing as synchronously as possible, so  
588 we knew the cells in a given sample were from embryos at the same stage. We examined the  
589 specification state of individual cells by determining which dGRN signature genes were  
590 expressed in seven intermediate cells randomly chosen from the intermediate zone (**Fig. 5**).  
591 These intermediate cells express dGRN signature genes of both fates until late in specification  
592 space (the latest we sampled was at 16 hpf which corresponds to the end of gastrulation in *Lv*).  
593 The transcriptional state of these cells moves quite far from the ancestral state over time, as seen  
594 by the progress across the triangles that represent specification space (**Figs. 3-5**), and yet they  
595 remain uncommitted, at least based upon the probabilities calculated from all genes expressed.  
596 This delayed specification of some cells could be quite valuable for an embryo, for instance by

597 contributing to flexibility in the exact number of fully differentiated cells of distinct fates.  
598 Whether this actually the case will require further study.

599

600 The published sea urchin dGRN was experimentally established in detail and repeated by  
601 many laboratories over two decades, providing a strong set of priors to assess. The data here do  
602 not challenge, nor are they capable of challenging, results of the perturbation experiments that  
603 were used to establish the connections in the published GRNs. Rather, our analyses assess the  
604 ability of scRNA-seq to reflect the spatiotemporal expression of the genes within the dGRN. We  
605 asked how predictive might the scRNA-seq approach be in producing a provisional dGRN? At  
606 any given time point, a pick of the top 200 genes in a lineage (based on a ratio comparison with  
607 expression in cells of the “other” lineage), included about 72% of the genes depicted in dGRN  
608 models of that tissue at that time. The remaining genes were also present in the scRNA-seq  
609 lineage time points but not in the top 200 lists because they either were expressed ubiquitously,  
610 or also expressed strongly in other lineages, thereby reducing the ratio. We conclude that the  
611 optimal transport approach operationalized by Waddington-OT offers an efficient way to identify  
612 candidate transcription factors in a given cell lineage prior to carrying out perturbation studies.

613

614 Experiments leading to the assembly of the *Sp* and *Lv* dGRN models have revealed a  
615 remarkable degree of conservation despite the 40-50 million years that have elapsed since their  
616 last common ancestor (McClay et al., 2020). At an even greater temporal distance of 500 million  
617 years, sea urchins and sea stars also share some conserved network circuits, although some  
618 transcription factors have assumed different roles in cell fate specification (Hinman and  
619 Davidson, 2007). Thus, over vast periods of time, networks are amenable to evolutionary  
620 rewiring, but the architecture appears constrained and resists change, as reflected by the small  
621 number of differences in dGRN models between *Sp* and *Lv*. Those models, however, did not  
622 include a careful analysis of timing of gene expression. They are also somewhat limited in that  
623 they consider transcription factors known at the time, and are not aware of other transcription  
624 factors and signals that may have important roles that remain uncharacterized. A dense scRNA-  
625 seq time course can amplify candidate gene identification, leading to deeper insight into the  
626 mechanisms of fate specification in embryos. Our finding that specification within some cell  
627 lineages occurs asynchronously and often quite delayed suggests we have much to learn of how

628 the cells of an embryo, especially a regulative embryo like the sea urchin, move toward their  
629 respective fates.

630

## 631 **Methods**

632

### 633 **Embryo Spawning and Culture**

634 Six female urchins were spawned by injecting 1ml 0.5M KCl intracoelomically. Unfertilized  
635 eggs were allowed to settle and washed three times in artificial sea water (ASW). Eggs were then  
636 resuspended, and fertilized by a single male's sperm in .03g PABA/100 ml ASW. Following  
637 fertilization, eggs were washed three additional times in ASW to remove residual PABA. The  
638 fertilized embryos were then combined and co-cultured together at 22-23 degrees Celsius while  
639 gently being stirred by a motorized stir rod. Embryos were then sampled at various time points to  
640 be dissociated and fixed for scRNA-seq. At each stage the embryos collected were very similar  
641 in stage to each other, an important consideration for temporally following development of the  
642 cells in this study.

643

### 644 **Embryo Dissociation and Fixation**

645 Once embryos developed to the appropriate stage, a portion of the co-culture was taken, and  
646 washed two times in Calcium-Free Artificial Seawater (CFASW). After washing embryos with  
647 CFASW, they were dissociated by gentle trituration after 10 minutes in dissociation buffer, made  
648 of 1.0M Glycine and 0.25mM EDTA, pH 8.0 with HCl at 4 degrees Celsius, and on the rocker.  
649 Following dissociation, cells were resuspended in CFASW, and fixed at a final concentration of  
650 80% Methanol in CFASW for one hour, at 4 degrees Celsius. Following fixation, cells were  
651 stored at -20 degrees Celsius, and all cell libraries were processed within one month of  
652 dissociation.

653

### 654 **Rehydration of Methanol Fixed Single Cells for Library Preparation and Sequencing**

655 Following fixation, cells were washed twice, and rehydrated in a 3x Saline Sodium Citrate buffer  
656 before cell count and library preparation. 19 single cell libraries were prepared using the 10x  
657 Genomics 3' v3 gene expression kit and the 10x Chromium platform to encapsulate single cells  
658 within droplets. Library quality was verified using the Agilent 2100 Bioanalyzer. Libraries were

659 pooled and Duke Genomics and Computational Biology Core facility sequenced samples across  
660 two NovaSeq6000 S1 flow cells with 28 x 8 x 91 bp sequencing performed.

661

## 662 **Computational Analysis**

663

### 664 **Data download, FastQ file generation, Genome Indexing, Genome Mapping and Counting,** 665 **production of raw csv counts files**

666 Following sequencing, we used Cellranger 3.1.0 to convert Illumina-generated BCL files to fastq  
667 files using the Cellranger “mkfastq” command. We then applied the “mkref” command to index  
668 the most recent *Lv3.0* Genome (Davidson et al., 2020). We then used the “count” command to  
669 demultiplex and count reads mapping to the reference *Lv* genome. The “mat2csv” command was  
670 used to get CSV RNA count matrix files for each sample for further downstream analysis. In  
671 addition, we used the command “aggr” on all samples to generate an automated 10x Cloupe  
672 browser that is easily accessible, and requires no coding experience to utilize.

673

### 674 **Filtering and normalization**

675 All CSV RNA count matrix files were uploaded to R and a *seurat* object was generated for each  
676 sample. All *seurat* objects were then merged to undergo uniform quality control, normalization  
677 and data exploration with all 19 samples. The merged object was then filtered to remove low  
678 quality cells with  $nFeature\_RNA > 200$ ,  $nFeature\_RNA < 7500$ , and  $percent.mt < 5$ .  
679 SCTransform was then applied to the merged filtered object to perform normalization and  
680 removal of technical variation, while preserving biological variation and various processes (see  
681 below). The data was then scaled, and variable features amongst the cells were found.

682

### 683 **Dimensionality reduction, visualization, and clustering**

684 We next performed Principal Component Analysis on the SCTransformed *seurat* object file, and  
685 found the nearest neighbors using 105 PC dimensions of variable gene space. UMAP was  
686 applied to multi-dimensional scRNA-seq data to visualize the cells in a two-dimensional space.  
687 Finally, clustering was performed using graph-based Louvain Clustering with resolution,  
688  $res=2.4$ , resulting in 63 clusters. The 63 clusters were annotated using dGRN genes, and  
689 published in situ hybridization patterns as markers.

690

## 691 **Inferring developmental trajectories with Waddington-OT**

692 We next applied Waddington-OT to infer developmental trajectories. As input, we used the  
693 SCTransform normalized expression matrix together with expansion rates estimated from  
694 expected changes in proportion of lineages over time (**Fig. S2**). Growth rates were estimated by  
695 lineage based on the expected number of cells of each lineage at key developmental time points.  
696 Growth rates were assumed to be uniform between estimates of expected number of cells.  
697 Maternal growth rates were assumed to be the expected growth rate across all cells at that time  
698 point.

699

700 Two additional growth rates were fit based on two cell cycle scores using a sigmoid function to  
701 smoothly fit growth rates between the minimum and maximum expected at that time point.  
702 Validation values were very similar between the two growth rates fit on the cell cycle scores and  
703 the growth rate based on expectation alone. For simplicity, the expectation-based growth rate  
704 was used throughout the analysis.

705

706 Transport maps were calculated using the growth rates described above, the optimization  
707 parameters  $\epsilon = 0.05$ ,  $\lambda_1 = 1$ , and  $\lambda_2 = 50$ , and a single iteration of growth rate learning.

708

## 709 **Validating trajectories with geodesic interpolation**

710 We validated our results by demonstrating that we can interpolate the distribution of cells at  
711 held-out timepoints (**Fig. S4**). For each triplet of consecutive time-points (e.g. 5,6,7 or 6,7,8 etc.),  
712 we held out the data from the middle time-point and attempted to reconstruct it by connecting the  
713 first to the third. We then quantified our performance by comparing to the held-out midpoint.  
714 The blue curve shows the results from optimal transport, which is lower than various null models  
715 (yellow, orange, green, purple). The null models are:

- 716 - “Random” (Orange): we randomly connect cells to descendants.
- 717 - “Random with growth” (yellow): We randomly connect cells to descendants,  
718 incorporating the same estimate of growth as for OT.
- 719 - “First” (Green): We use the first time-point in the triplet to estimate the second element  
720 of the triplet.

721 - “Last” (Purple): We use the third element of the triplet to estimate the second element.

722

723 In order to test the stability of our results, we varied parameters of optimal transport over an  
724 order of magnitude in each direction (see **Fig. S4B-D**). Additionally, we repeated the analysis on  
725 datasets with downsampled cells and reads as low as 10% of cells and 500 UMI per cell  
726 respectively. Downsampling cells, we found, using Waddington-OT, outperformed null methods  
727 for all proportions and only saw a gradual increase in validation values (**Fig. S4E**).

728 Downsampling reads, we found Waddington-OT outperformed null methods down to 500 UMI  
729 (**Fig. S4F**).

730

### 731 **Visualizing divergence of fates with barycentric coordinates**

732 In order to visualize the divergence of fates, we developed a simple way to visualize fate  
733 probabilities for triples (or quadruples) of lineages in a triangular (or tetrahedral) plot. The  
734 visualization employs barycentric coordinates to represent k-dimensional probability vectors in  
735 k-1-dimensional space. We identify a corner of the triangle for each of these possible fates, and  
736 position the cells according to their relative probabilities as follows:

737

738 Let  $a, b, c$  denote the vertices of the triangle in  $R^2$  and let  $p = (p_1, p_2, p_3)$  denote the probability  
739 vector we wish to visualize. The components of  $p$  are used as coefficients in a convex  
740 combination of the vertices. In other words, the probability vector  $p$  is mapped to  $p_1a + p_2b +$   
741  $p_3c \in R^2$ . Note that  $p_1 + p_2 + p_3 = 1$ , so each probability vector is mapped to a point inside the  
742 triangle.

743

744 Cells perfectly fated to obtain a single fate are positioned exactly at the corresponding vertex,  
745 while cells with indeterminate fates are positioned in the interior of the triangle. The very center  
746 of the triangle corresponds to cells that are equally likely to choose any of the three fates, and  
747 cells along an edge have zero chance of reaching the opposite vertex. **Fig. 3** illustrates examples  
748 of how selected pairs of lineages diverge in  $L_V$  over time. **Movie S1** shows a tetrahedron  
749 visualization of the divergence of four fates simultaneously.

750

### 751 **Visualizing Gene Regulatory Networks**



752 We visualized signature genes from the dGRNs on the triangle plots and the UMAP plots using  
753 GRN score ratios. The illustration aimed to show how intermediate cells tend to express  
754 networks from both possible fates. GRN score was defined as the fraction of genes from the  
755 signature list that are expressed in a cell. Each cell was given two of these scores, each  
756 corresponding to a GRN of interest. To compare the expression of one regulatory network to the  
757 other, we defined a GRN score ratio as  $\min\left(\frac{GRN\ 1\ Score}{GRN\ 2\ Score}, \frac{GRN\ 2\ Score}{GRN\ 1\ Score}\right)$ . The ratio produces values  
758 between 0 and 1. A value of 0 means only one of the networks is expressed in the cell.  
759 Meanwhile, a value of 1 means both networks are expressed in equal proportion. **Figs. 5 and S5**  
760 shows cells colored by this ratio.

761

### 762 **Gene Ontology Analysis**

763 We used functional enrichment analyses to determine if there are any biological processes (BP)  
764 and molecular functions (MF) that were overrepresented among each lineage based on  
765 differentially expressed genes. Enrichment analyses were conducted with a rank-based gene  
766 enrichment method that was originally implemented for bulk-RNAseq data, GO-MWU (Wright  
767 et al., 2015). Here, we adapted this method to process data output from our single-cell data  
768 output files of differential gene expression where we used pct.1 (percentage of cells with  
769 differentially expressed gene) instead of kME values (module membership scores). In this case,  
770 we implemented global Fisher's exact test for presence-absence of functional categories in the  
771 cluster, and then, within cluster MWU test for association of the included categories with higher  
772 pct.1 values. Results were plotted using alluvial plots, here we plotted the top 5 BP and MF  
773 categories in each lineage according to their lowest p-adjusted values and used custom R scripts  
774 to consolidate data tables and plot figures (**Fig. S6**).

775

776 **Acknowledgements:** The authors thank members of the McClay, Wray and Schiebinger labs for  
777 their critical input and feedback. We also appreciate the help provided by Nicolas Devos, Ph.D,  
778 and the Duke GCB core facility. We also appreciate the assistance provided by Philip Benfey,  
779 Ph.D lab members, especially postdoctoral fellows Rachel Shahan, Ph.D and Isaiah Taylor,  
780 Ph.D in the Biology Department.

781

782 **Competing interests.** No competing interests declared.

783

784 **Funding** Support for this project was provided by NIH to DRM (RO1 HD 14483 and PO1  
785 HD037105), and by NSF to GAW (IOS-1457305) and AJM for his NSF predoctoral fellowship  
786 (DGE-1644868). GS is supported by a Career Award at the Scientific Interface from the  
787 Burroughs Welcome Fund, and by funds from the Klarman Cell Observatory

788 **References**

789

790 **Alles, J., Karaiskos, N., Praktijnjo, S.D., Grosswendt, S., Wahle, P., Ruffault, P.L., Ayoub,**  
791 **S., Schreyer, L., Boltengagen, A., Birchmeier, C., Zinzen, R., Kocks, C., Rajewsky, N.,**  
792 (2017). Cell fixation and preservation for droplet-based single-cell transcriptomics. *BMC Biol*  
793 **15**, 44.

794

795 **Becht, E., McInnes, L., Healy, J., Dutertre, C.-A., Kwok, I.W.H., Ng, L.G., Ginhoux, F.,**  
796 **Newell, E.W.,** (2018). Dimensionality reduction for visualizing single-cell data using UMAP.  
797 *Nature biotechnology*.

798

799 **Ben-Tabou de-Leon, S., Su, Y.H., Lin, K.T., Li, E., Davidson, E.H.,** (2013). Gene regulatory  
800 control in the sea urchin aboral ectoderm: spatial initiation, signaling inputs, and cell fate  
801 lockdown. *Dev Biol* **374**, 245-254.

802

803 **Bolouri, H., Davidson, E.H.,** (2003). Transcriptional regulatory cascades in development: initial  
804 rates, not steady state, determine network kinetics. *Proc Natl Acad Sci U S A* **100**, 9371-9376.

805

806 **Brandman, O., Meyer, T.,** (2008). Feedback loops shape cellular signals in space and time.  
807 *Science* **322**, 390-395.

808

809 **Butler, A., Hoffman, P., Smibert, P., Papalexi, E., Satija, R.,** (2018). Integrating single-cell  
810 transcriptomic data across different conditions, technologies, and species. *Nature biotechnology*  
811 **36**, 411-420.

812

813 **Campanale, J.P., Gokirmak, T., Espinoza, J.A., Oulhen, N., Wessel, G.M., Hamdoun, A.,**  
814 (2014). Migration of sea urchin primordial germ cells. *Dev Dyn* **243**, 917-927.

815

816 **Cano, A., Perez-Moreno, M.A., Rodrigo, I., Locascio, A., Blanco, M.J., del Barrio, M.G.,**  
817 **Portillo, F., Nieto, M.A.,** (2000). The transcription factor snail controls epithelial-mesenchymal  
818 transitions by repressing E-cadherin expression. *Nat Cell Biol* **2**, 76-83.

819

820 **Cao, J., Packer, J.S., Ramani, V., Cusanovich, D.A., Huynh, C., Daza, R., Qiu, X., Lee, C.,**  
821 **Furlan, S.N., Steemers, F.J., Adey, A., Waterston, R.H., Trapnell, C., Shendure, J.,** (2017).  
822 Comprehensive single-cell transcriptional profiling of a multicellular organism. *Science* **357**,  
823 661-667.

824

825 **Chen, J., Cheung, F., Shi, R., Zhou, H., Lu, W., Consortium, C.H.I.,** (2018). PBMC fixation  
826 and processing for Chromium single-cell RNA sequencing. *J Transl Med* **16**, 198.

827

828 **Conklin, E.G.,** (1897). The embryology of *Crepidula*. *J. Morph.* **13**, 1-226

829

830 **Conklin, E.G.,** (1905). The organization and cell lineage of the ascidian egg. *J. Acad. Nat. Sci.*  
831 **8**, 1-119.

832

- 833 **Davidson, E.H., Cameron, R.A., Ransick, A.**, (1998). Specification of cell fate in the sea  
834 urchin embryo: summary and some proposed mechanisms. *Development* **125**, 3269-3290.  
835
- 836 **Davidson, E.H., Rast, J.P., Oliveri, P., Ransick, A., Calestani, C., Yuh, C.H., Minokawa, T.,**  
837 **Amore, G., Hinman, V., Arenas-Mena, C., Otim, O., Brown, C.T., Livi, C.B., Lee, P.Y.,**  
838 **Revilla, R., Rust, A.G., Pan, Z., Schilstra, M.J., Clarke, P.J., Arnone, M.I., Rowen, L.,**  
839 **Cameron, R.A., McClay, D.R., Hood, L., Bolouri, H.**, (2002). A genomic regulatory network  
840 for development. *Science* **295**, 1669-1678.  
841
- 842 **Davidson, P.L., Guo, H., Wang, L., Berrio, A., Zhang, H., Chang, Y., Soborowski, A.L.,**  
843 **McClay, D.R., Fan, G., Wray, G.A.**, (2020). Chromosomal-Level Genome Assembly of the  
844 Sea Urchin *Lytechinus variegatus* Substantially Improves Functional Genomic Analyses.  
845 *Genome Biol Evol* **12**, 1080-1086.  
846
- 847 **Driever, W., Nusslein-Volhard, C.**, (1988). A gradient of bicoid protein in *Drosophila* embryos.  
848 *Cell* **54**, 83-93.  
849
- 850 **Erkenbrack, E.M., Davidson, E.H.**, (2015). Evolutionary rewiring of gene regulatory network  
851 linkages at divergence of the echinoid subclasses. *Proc Natl Acad Sci U S A* **112**, E4075-4084.  
852
- 853 **Erwin, D.H., Davidson, E.H.**, (2009). The evolution of hierarchical gene regulatory networks.  
854 *Nat Rev Genet* **10**, 141-148.  
855
- 856 **Farrell, J.A., Wang, Y., Riesenfeld, S.J., Shekhar, K., Regev, A., Schier, A.F.**, 2018. Single-  
857 cell reconstruction of developmental trajectories during zebrafish embryogenesis. *Science* **360**.  
858
- 859 **Fincher, C.T., Wurtzel, O., de Hoog, T., Kravarik, K.M., Reddien, P.W.**, (2018). Cell type  
860 transcriptome atlas for the planarian *Schmidtea mediterranea*. *Science* **360**.  
861
- 862 **Foster, S., Oulhen, N., Wessel, G.**, (2020). A single cell RNA-seq resource for early sea urchin  
863 development. *Development*. **147**.  
864
- 865 **Guo, S., Kempthues, K.J.**, (1995). *par-1*, a gene required for establishing polarity in *C. elegans*  
866 embryos, encodes a putative Ser/Thr kinase that is asymmetrically distributed. *Cell* **81**, 611-620.  
867
- 868 **Hafemeister, C., Satija, R.**, (2019). Normalization and variance stabilization of single-cell  
869 RNA-seq data using regularized negative binomial regression. *Genome Biol* **20**, 296.  
870
- 871 **Han, X., Wang, R., Zhou, Y., Fei, L., Sun, H., Lai, S., Saadatpour, A., Zhou, Z., Chen, H.,**  
872 **Ye, F., Huang, D., Xu, Y., Huang, W., Jiang, M., Jiang, X., Mao, J., Chen, Y., Lu, C., Xie,**  
873 **J., Fang, Q., Wang, Y., Yue, R., Li, T., Huang, H., Orkin, S.H., Yuan, G.C., Chen, M., Guo,**  
874 **G.**, (2018). Mapping the Mouse Cell Atlas by Microwell-Seq. *Cell* **172**, 1091-1107 e1017.  
875
- 876 **Haque, A., Engel, J., Teichmann, S.A., Lonnberg, T.**, (2017). A practical guide to single-cell  
877 RNA-sequencing for biomedical research and clinical applications. *Genome Med* **9**, 75.  
878

- 879 **Hinman, V.F., Davidson, E.H.,** (2007). Evolutionary plasticity of developmental gene  
880 regulatory network architecture. *Proc Natl Acad Sci U S A* **104**, 19404-19409.  
881
- 882 **Hinman, V.F., Nguyen, A.T., Cameron, R.A., Davidson, E.H.,** (2003). Developmental gene  
883 regulatory network architecture across 500 million years of echinoderm evolution. *Proc Natl*  
884 *Acad Sci U S A* **100**, 13356-13361.  
885
- 886 **Israel, J.W., Martik, M.L., Byrne, M., Raff, E.C., Raff, R.A., McClay, D.R., Wray, G.A.,**  
887 (2016). Comparative Developmental Transcriptomics Reveals Rewiring of a Highly Conserved  
888 Gene Regulatory Network during a Major Life History Switch in the Sea Urchin Genus  
889 *Heliocidaris*. *PLoS Biol* **14**, e1002391.  
890
- 891 **Juliano, C., Swartz, S.Z., Wessel, G.,** (2014). Isolating specific embryonic cells of the sea  
892 urchin by FACS. *Methods Mol Biol* **1128**, 187-196.  
893
- 894 **Karaiskos, N., Wahle, P., Alles, J., Boltengagen, A., Ayoub, S., Kipar, C., Kocks, C.,**  
895 **Rajewsky, N., Zinzen, R.P.,** (2017). The *Drosophila* embryo at single-cell transcriptome  
896 resolution. *Science* **358**, 194-199.  
897
- 898 **Kemphues, K.J., Priess, J.R., Morton, D.G., Cheng, N.S.,** (1988). Identification of genes  
899 required for cytoplasmic localization in early *C. elegans* embryos. *Cell* **52**, 311-320.  
900
- 901 **LeDouarin, N.M., Jotereau, F.V.,** (1973). Origin and renewal of lymphocytes in avian embryo  
902 thymuses studied in interspecific combinations. *Nat New Biol* **246**, 25-27.  
903
- 904 **Li, E., Materna, S.C., Davidson, E.H.,** (2013). New regulatory circuit controlling spatial and  
905 temporal gene expression in the sea urchin embryo oral ectoderm GRN. *Dev Biol* **382**, 268-279.  
906
- 907 **Livet, J.,** (2007). [The brain in color: transgenic "Brainbow" mice for visualizing neuronal  
908 circuits]. *Med Sci (Paris)* **23**, 1173-1176.  
909
- 910 **Logan, C.Y., McClay, D.R.,** (1999). Lineages that give rise to endoderm and Mesoderm in the  
911 sea urchin embryo. In: *Cell Lineage and Fate Determination* (S. Moody, ed) Academic Press,  
912 San Diego. pp. 41-57.  
913
- 914 **Longabaugh, W.J., Davidson, E.H., Bolouri, H.,** (2009). Visualization, documentation,  
915 analysis, and communication of large-scale gene regulatory networks. *Biochim Biophys Acta*  
916 **1789**, 363-374.  
917
- 918 **Martik, M.L., McClay, D.R.,** (2015). Deployment of a retinal determination gene network  
919 drives directed cell migration in the sea urchin embryo. *Elife* **4**.  
920
- 921 **Martik, M.L., McClay, D.R.,** (2017). New insights from a high-resolution look at gastrulation  
922 in the sea urchin, *Lytechinus variegatus*. *Mech Dev* **148**, 3-10.  
923

- 924 **Massri, A.J., Schiebinger, G.R., Berrio, A., Wang, L., Wray, G.A., McClay, D.R.,** (2021).  
925 Methodologies for Following EMT In Vivo at Single Cell Resolution. *Methods Mol Biol* **2179**,  
926 303-314.  
927
- 928 **Materna, S.C., Nam, J., Davidson, E.H.,** (2010). High accuracy, high-resolution prevalence  
929 measurement for the majority of locally expressed regulatory genes in early sea urchin  
930 development. *Gene Expr Patterns* **10**, 177-184.  
931
- 932 **McClay, D.R.,** (1986). Embryo dissociation, cell isolation, and cell reassociation. *Meth. Cell*  
933 *Biol.* **27**, 309-323.  
934
- 935 **McClay, D.R.,** (2011). Evolutionary crossroads in developmental biology: sea urchins.  
936 *Development* **138**, 2639-2648.  
937
- 938 **McClay, D.R., Warner, J., Martik, M., Miranda, E., Slota, L.,** (2020). Gastrulation in the sea  
939 urchin. *Curr Top Dev Biol* **136**, 195-218.  
940
- 941 **Nishida, H., Sawada, K.,** (2001). macho-1 encodes a localized mRNA in ascidian eggs that  
942 specifies muscle fate during embryogenesis. *Nature* **409**, 724-729.  
943
- 944 **Nusslein-Volhard, C., Wieschaus, E.,** (1980). Mutations affecting segment number and polarity  
945 in *Drosophila*. *Nature* **287**, 795-801.  
946
- 947 **Oliveri, P., Carrick, D.M., Davidson, E.H.,** (2002). A regulatory gene network that directs  
948 micromere specification in the sea urchin embryo. *Dev Biol* **246**, 209-228.  
949
- 950 **Oliveri, P., Davidson, E.H., McClay, D.R.,** (2003). Activation of pmar1 controls specification  
951 of micromeres in the sea urchin embryo. *Dev Biol* **258**, 32-43.  
952
- 953 **Pan, Y.A., Livet, J., Sanes, J.R., Lichtman, J.W., Schier, A.F.,** (2011). Multicolor Brainbow  
954 imaging in zebrafish. *Cold Spring Harb Protoc* 2011, pdb prot5546.  
955
- 956 **Perillo, M., Oulhen, N., Foster, S., Spurrell, M., Calestani, C., Wessel, G.,** (2020). Regulation  
957 of dynamic pigment cell states at single-cell resolution. *Elife* **9**.  
958
- 959 **Peter, I.S., Davidson, E.H.,** (2015). *Genomic Control Process*. Development and Evolution.  
960 Academic Press, San Diego  
961
- 962 **Plass, M., Solana, J., Wolf, F.A., Ayoub, S., Misios, A., Glazar, P., Obermayer, B., Theis,**  
963 **F.J., Kocks, C., Rajewsky, N.,** (2018). Cell type atlas and lineage tree of a whole complex  
964 animal by single-cell transcriptomics. *Science* **360**.  
965
- 966 **Revilla-i-Domingo, R., Oliveri, P., Davidson, E.H.,** (2007). A missing link in the sea urchin  
967 embryo gene regulatory network: hesC and the double-negative specification of micromeres.  
968 *Proc Natl Acad Sci U S A* **104**, 12383-12388.  
969

- 970 **Schiebinger, G., Shu, J., Tabaka, M., Cleary, B., Subramanian, V., Solomon, A., Gould, J.,**  
971 **Liu, S., Lin, S., Berube, P., Lee, L., Chen, J., Brumbaugh, J., Rigollet, P., Hochedlinger, K.,**  
972 **Jaenisch, R., Regev, A., Lander, E.S.,** (2019). Optimal-Transport Analysis of Single-Cell Gene  
973 Expression Identifies Developmental Trajectories in Reprogramming. *Cell* **176**, 1517.  
974  
975 **Slota, L.A., McClay, D.R.,** (2018). Identification of neural transcription factors required for the  
976 differentiation of three neuronal subtypes in the sea urchin embryo. *Dev Biol* **435**, 138-149.  
977  
978 **Stuart, T., Butler, A., Hoffman, P., Hafemeister, C., Papalexi, E., Mauck, W.M., 3rd, Hao,**  
979 **Y., Stoeckius, M., Smibert, P., Satija, R.,** (2019). Comprehensive Integration of Single-Cell  
980 Data. *Cell* **177**, 1888-1902.e1821.  
981  
982 **Sulston, J.E., Horvitz, H.R.,** (1977). Post-embryonic cell lineages of the nematode,  
983 *Caenorhabditis elegans*. . *Dev. Biol.* **56**, 110-156.  
984  
985 **Sulston, J.E., Schierenberg, E., White, J.G., Thomson, J.N.,** (1983). The embryonic cell  
986 lineage of the nematode *Caenorhabditis elegans*. . *Dev. Biol.* **100**, 64-119.  
987  
988 **Svensson, V., Natarajan, K.N., Ly, L.-H., Miragaia, R.J., Labalette, C., Macaulay, I.C.,**  
989 **Cvejic, A., Teichmann, S.A.,** (2017). Power analysis of single-cell RNA-sequencing  
990 experiments. *Nature methods* **14**, 381-387.  
991  
992 **Tintori, S.C., Osborne Nishimura, E., Golden, P., Lieb, J.D., Goldstein, B.,** 2016. A  
993 Transcriptional Lineage of the Early *C. elegans* Embryo. *Dev Cell* **38**, 430-444.  
994  
995 **Voronina, E., Lopez, M., Juliano, C.E., Gustafson, E., Song, J.L., Extavour, C., George, S.,**  
996 **Oliveri, P., McClay, D., Wessel, G.,** (2008). Vasa protein expression is restricted to the small  
997 micromeres of the sea urchin, but is inducible in other lineages early in development. *Dev Biol*  
998 **314**, 276-286.  
999  
1000 **Wagner, D.E., Weinreb, C., Collins, Z.M., Briggs, J.A., Megason, S.G., Klein, A.M.,** (2018).  
1001 Single-cell mapping of gene expression landscapes and lineage in the zebrafish embryo. *Science*  
1002 **360**, 981-987.  
1003  
1004 **Wray, G.A., McClay, D.R.,** (1988). The origin of spicule-forming cells in a 'primitive' sea  
1005 urchin (*Eucidaris tribuloides*) which appears to lack primary mesenchyme cells. *Development*  
1006 **103**, 305-315.  
1007  
1008 **Wright, R.M., Aglyamova, G.V., Meyer, E., Matz, M.V.,** (2015). Gene expression associated  
1009 with white syndromes in a reef building coral, *Acropora hyacinthus*. *BMC genomics* **16**, 371.  
1010  
1011 **Wu, S.Y., McClay, D.R.,** (2007). The Snail repressor is required for PMC ingression in the sea  
1012 urchin embryo. *Development* **134**, 1061-1070.  
1013

1014 **Yeger-Lotem, E., Sattath, S., Kashtan, N., Itzkovitz, S., Milo, R., Pinter, R.Y., Alon, U.,**  
1015 **Margalit, H.,** (2004). Network motifs in integrated cellular networks of transcription-regulation  
1016 and protein-protein interaction. *Proc Natl Acad Sci U S A* **101**, 5934-5939.

1017  
1018 **Zhou, X., Franklin, R.A., Adler, M., Jacox, J.B., Bailis, W., Shyer, J.A., Flavell, R.A.,**  
1019 **Mayo, A., Alon, U., Medzhitov, R.,** (2018). Circuit Design Features of a Stable Two-Cell  
1020 System. *Cell* **172**, 744-757 e717.

1021  
1022 **Ziegenhain, C., Vieth, B., Parekh, S., Reinius, B., Guillaumet-Adkins, A., Smets, M.,**  
1023 **Leonhardt, H., Heyn, H., Hellmann, I., Enard, W.,** (2017). Comparative Analysis of Single-  
1024 Cell RNA Sequencing Methods. *Mol Cell* **65**, 631-643 e634.

1025  
1026  
1027

## 1028 **Figure Legends**

1029

1030 **Fig. 1: Temporal atlas of scRNA-seq profiles during development of the sea urchin,**

1031 ***Lytechinus variegatus*. A.** A time-line of development over 24 hours with representative stages

1032 of development illustrated. Colors represent lineages as in Fig.1B: ectoderm (blue), oral

1033 ectoderm (dark blue), aboral ectoderm (light blue), skeletogenic mesoderm (red), primordial

1034 germ cells (pink), non-skeletogenic mesoderm (orange), pigment cells (beige), endoderm,

1035 (yellow), ciliary band (violet), animal pole domain (green), early cleavage (gray). The dots on

1036 time points are colored according to the time points as in Fig. 1C. **B.** UMAP plot mapped

1037 according to lineage domains. Sixty three clusters were identified and grouped into 16 domains

1038 representing the lineages present at 24 hpf. The colors are the same as for the embryos

1039 diagrammed in Fig. 1A. **C.** The UMAP plot colored according to time of development showing

1040 the position of the 18 timepoints collected during the first 24 hrs post fertilization (hpf). The

1041 colors along the time-line are the same as those in the UMAP plot. PGC = primordial germ cells;

1042 CP = coelomic pouch; PMC = primary mesenchyme cell (also called skeletogenic cells); NSM =

1043 non-skeletogenic mesenchyme; Blasto – blastocoelar cells; Endo = endoderm; Ecto = ectoderm;

1044 Border = ectoderm at the border between ectoderm and endoderm; OR = oral; CB = ciliary band;

1045 APD = animal pole domain; AB = aboral.

1046

1047 **Fig. 2: Dotplot of genes expressed in the sea urchin developmental Gene Regulatory**

1048 **Network (dGRN).** 52 of the more than 80 genes expressed in the dGRN models (Ben-Tabou de-

1049 Leon et al., 2013; Li et al., 2013; Peter and Davidson, 2015) were plotted according to



1050 expression in the clusters listed on the Y axis. The dots of each shows relative level of expression  
1051 in that cluster as well as the percentage of cells in that cluster that express that gene indicated by  
1052 size of the dot. Boxes surround the clusters assigned to PGC, PMC, NSM, Endoderm and  
1053 Ectoderm. Some genes are expressed outside the boxes. Those genes are expressed in more than  
1054 one lineage, sometimes at the same time and in other cases at different times.

1055

1056 **Fig. 3: Diversification of Cell Lineages computed using the Waddington-OT optimal**

1057 **transport method** (Schiebinger et al., 2019). **A.** Time-line represented by the plots with dots to

1058 indicate the times shown. The 6 hpf time point is the blastula stage, 8 hpf = hatched blastula; 10

1059 hpf = mesenchyme blastula; and 12 hpf = early gastrula stages. **B.** UMAPs at those four time

1060 points showing presumptive ectoderm (blue), endoderm (yellow), NSM (orange) and PMCs

1061 (red). **C.** Triangle plots show progression of lineages at different time points, with vertices

1062 designated Endoderm, PMC, and “other” to represent all other lineages. **D.** Triangle plots with

1063 vertices designated Endoderm, NSM, and Other to represent all other lineages. The colored cells

1064 in the triangle plots are those cells with at least a 60% probability of becoming one of the colored

1065 lineages represented. Cells that have not reached a 60% probability toward any of those fates are

1066 colored gray. Cells that hug a side of the triangle have low to no chance of becoming a cell on

1067 the opposite vertex. Cells in the exact middle of the triangle have an equal chance of becoming a

1068 cell of any type. Two major patterns are shown. On the top row PMCs are committed to one side

1069 of the triangle from the earliest time point onward. On the bottom row the NSM and Endoderm

1070 lineages are committed later with many gray cells entirely traversing the triangle to the opposite

1071 side with an extended delay in their commitment toward endoderm or NSM.

1072

1073 **Fig. 4: Predictive ability of Waddington-OT plots relative to published dGRNs.** **A.** Future

1074 PMCs at 6 hpf. The cells in red are those that have >60% probability of becoming PMCs while

1075 those in gray either have not reached that level of probability or are in the process of being

1076 specified toward other fates. The position of those cells is also shown on the UMAP plot. **B.**

1077 Future endoderm seen at 9hpf. In yellow (>60% probability). All other cells are shown in gray.

1078 **C.** A dGRN of PMCs with the boxed in area showing genes expressed at 6 hpf. Genes in bold

1079 letters are those genes in the top 200 list of genes when the red vs gray genes are compared from

1080 the 6 hpf time point in **A.** **D.** dGRN of endoderm at 9hpf. Shown in the box are all endoderm

1081 dGRN genes expressed at 9 hpf. Genes in bold are those in the top 200 list of genes at that time  
1082 in the endoderm when the presumptive endoderm cells were compared with all other cells in the  
1083 embryo at that time.

1084

1085 **Fig. 5: “Intermediate” cell states defined by dGRN gene signatures. A.** In this plot a group of  
1086 signature genes expressed by either endoderm or NSM were chosen using the same group of  
1087 cells shown in Fig. 4B. In this triangle cells that are dark blue are committed to either endoderm  
1088 or NSM based on expression either of endoderm signature genes only, mesoderm signature genes  
1089 only, or “other” genes. Cells that are intermediate and express both endoderm and NSM  
1090 signature genes are colored from yellow (1:1 endoderm;NSM expression) to ratios that trend  
1091 toward one or the other profile. To ask which signature genes are expressed in samples along the  
1092 wave of intermediate cells we sampled 7 cells (in pink). **Fig. S5** shows the signature genes  
1093 expressed in each of these cells. Note: the position of each cell is based on Waddington-OT  
1094 which uses an algorithm based on all genes expressed by each cell so the signature genes from  
1095 the dGRNs are but a few of the more than 1000 total genes expressed by each cell, but those  
1096 transcription factors in the dGRNs likely have a major impact by controlling expression of many  
1097 of the total number of genes per cell given their regulatory role in development. **B.** The data from  
1098 the triangle plot shown on the UMAP plot, including the pink cells.

1099

1100 **Fig. 6: Heterochronic transcriptional activation of dGRN genes.** The x-axis indicates the time  
1101 of first expression in *S. purpuratus*, with each gene indicated by a circle corresponding to germ  
1102 layer or territory. The y-axis indicates when that same gene is first expressed in *L. variegatus*  
1103 relative to *S. purpuratus* after normalizing for temperature difference. If a gene is on the  
1104 horizontal line, its time of first expression is approximately the same in the two species. Due to  
1105 imprecision in estimating the difference in overall rates of development, differences of <2h are  
1106 also considered conserved (indicated by the gray box). Genes above the horizontal line and  
1107 outside the gray box are expressed earlier in *L. variegatus* and those below are expressed later.  
1108 Many genes are maternally expressed in both species (box pointing to 0 hr), while four are  
1109 maternally expressed in one species but not in the other (*hesC*, *hex*, *myc*, and *scl*). Note that the  
1110 time of first expression can be uncoupled in different territories (e.g., *blimp1b* is heterochronic in  
1111 primary mesenchyme but not in endomesoderm). In addition, some genes expressed

1112 simultaneously in *S. purpuratus* are expressed both earlier and later in *L. variegatus* (e.g., *smo*,  
1113 *snail*, *FoxA*, and *FoxB* are activated at 19 hpf in *S. purpuratus* but range from 6 hr earlier to 4 hr  
1114 later in *L. variegatus*). Of the 49 GRN genes plotted here, 15 have conserved timing due to being  
1115 maternally expressed, 4 have conserved zygotic timing, and 37 have heterochronic zygotic  
1116 expression in at least one territory of expression.  
1117

# Fig. 1

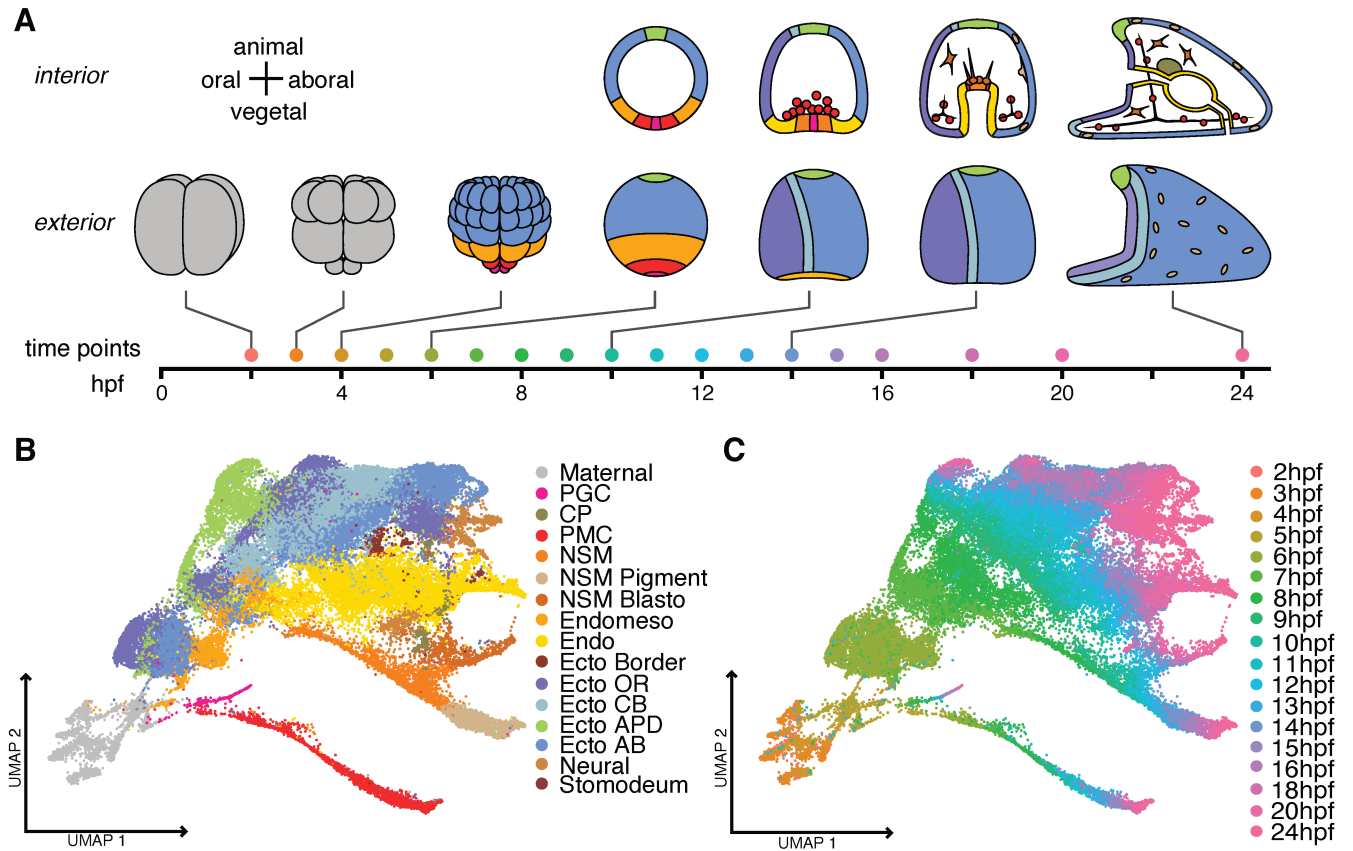

Fig. 2

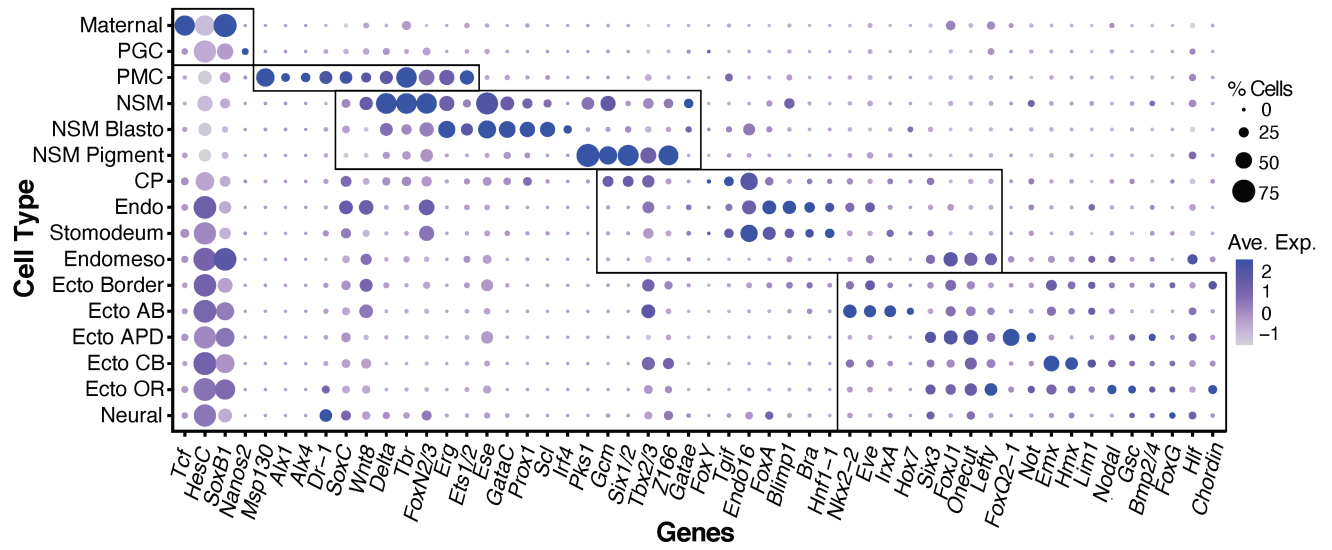

### Fig. 3

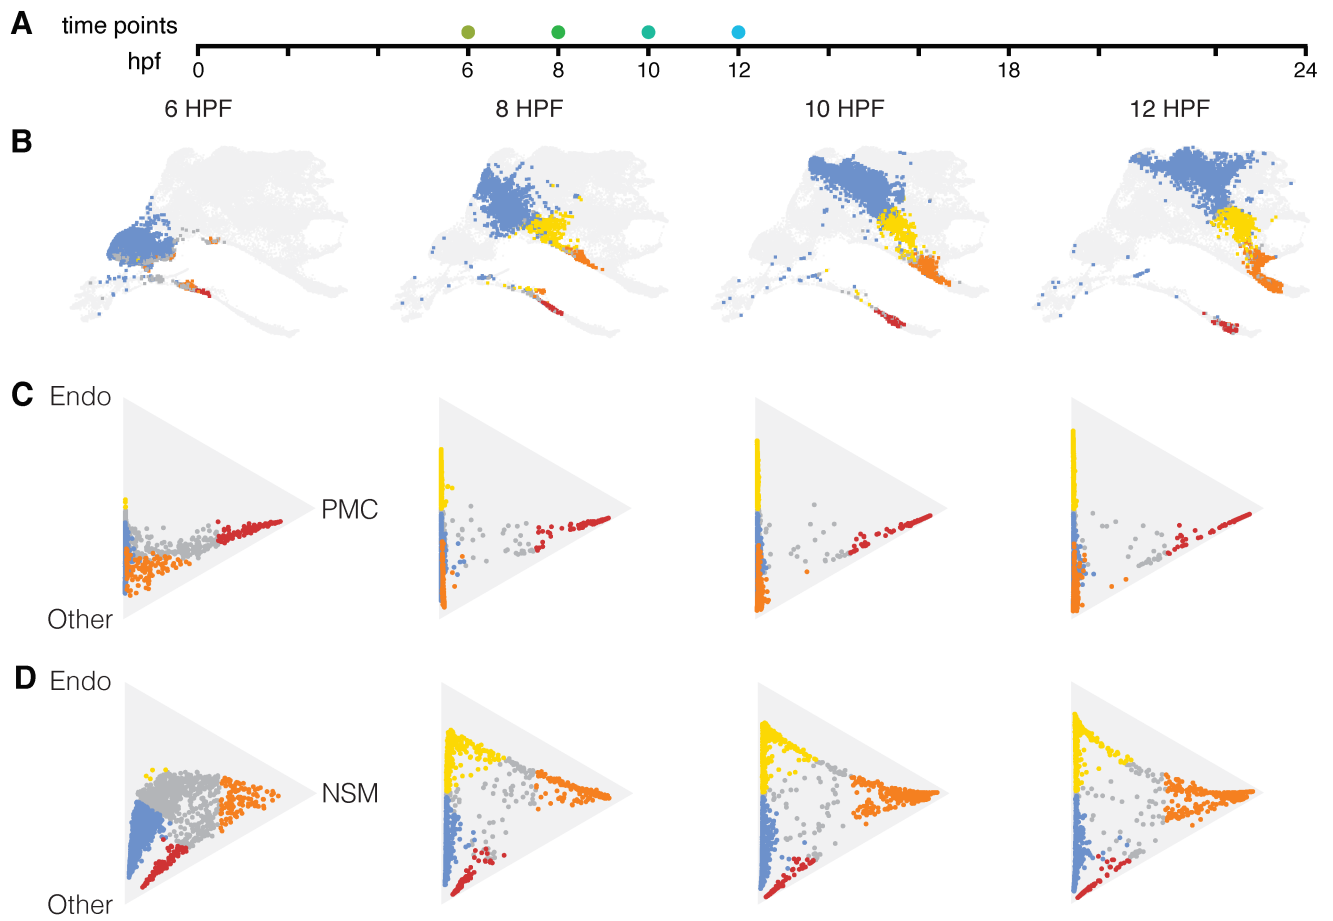

Fig. 4

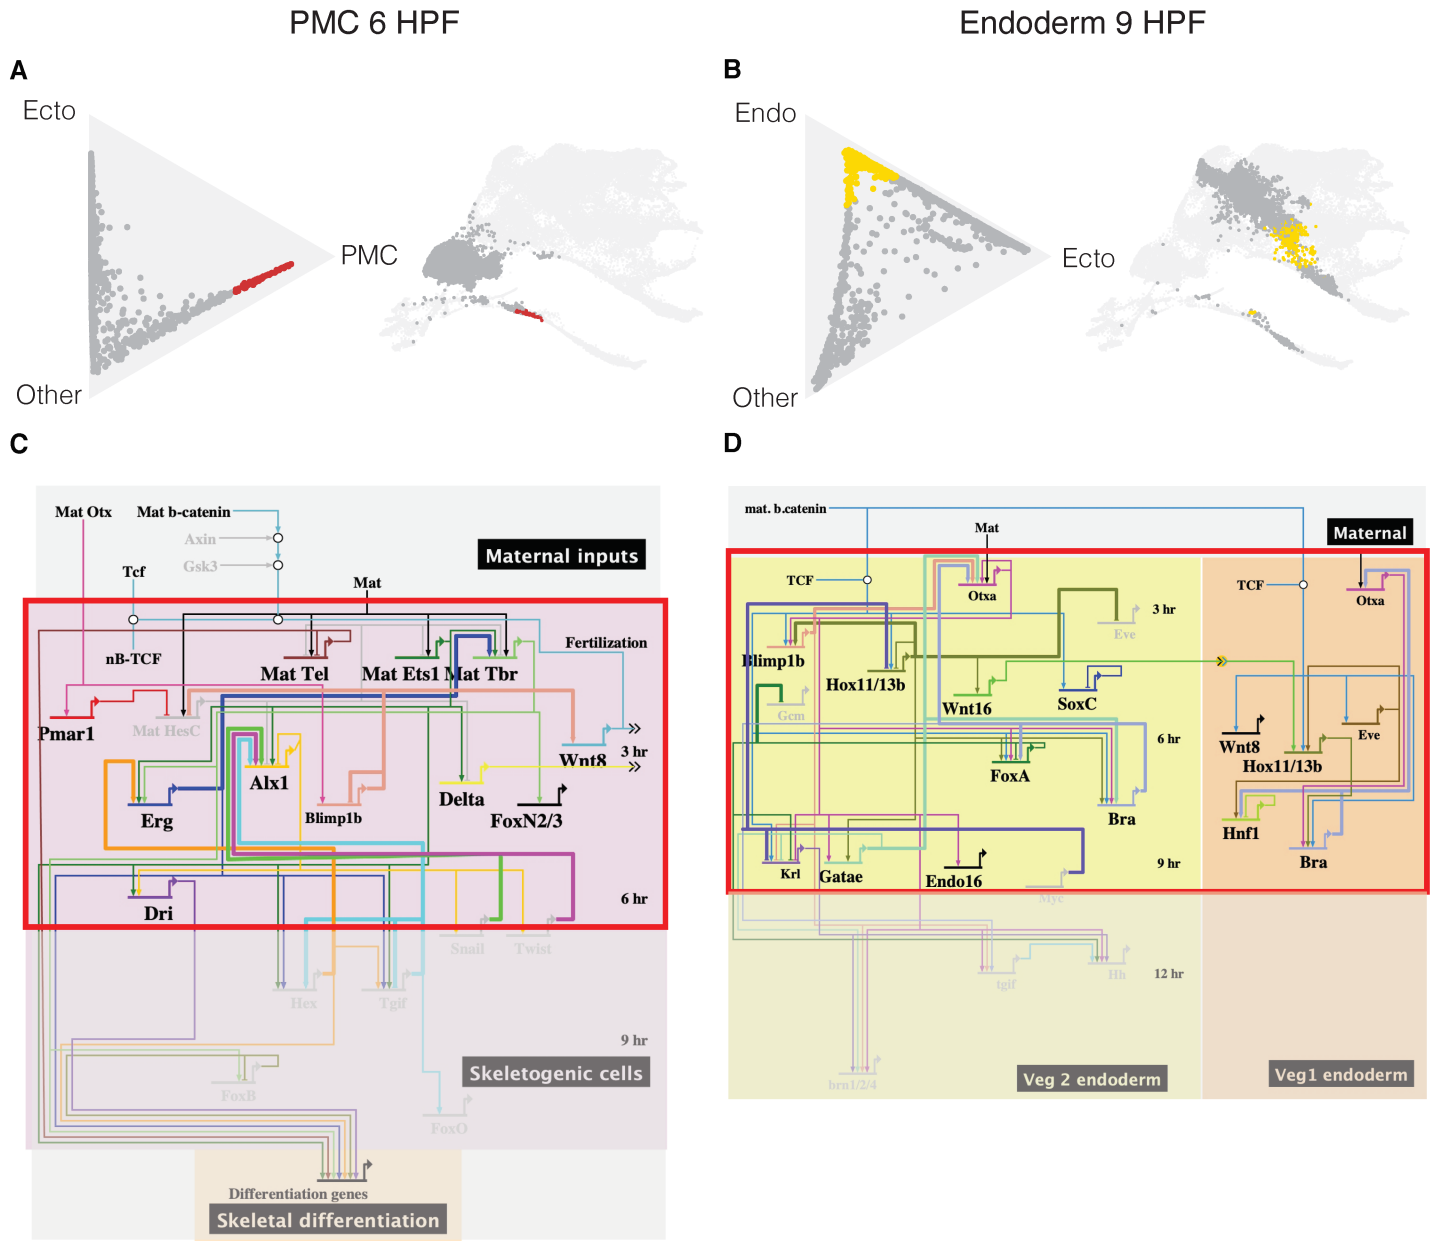

Fig. 5

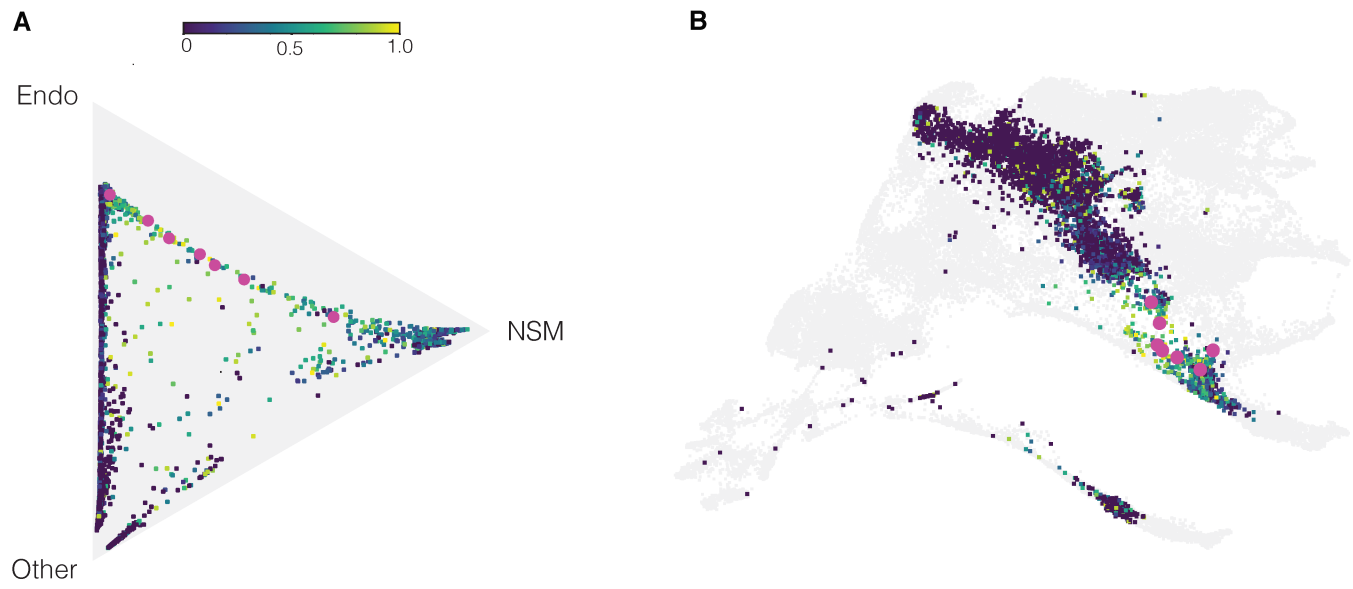



Fig. 6

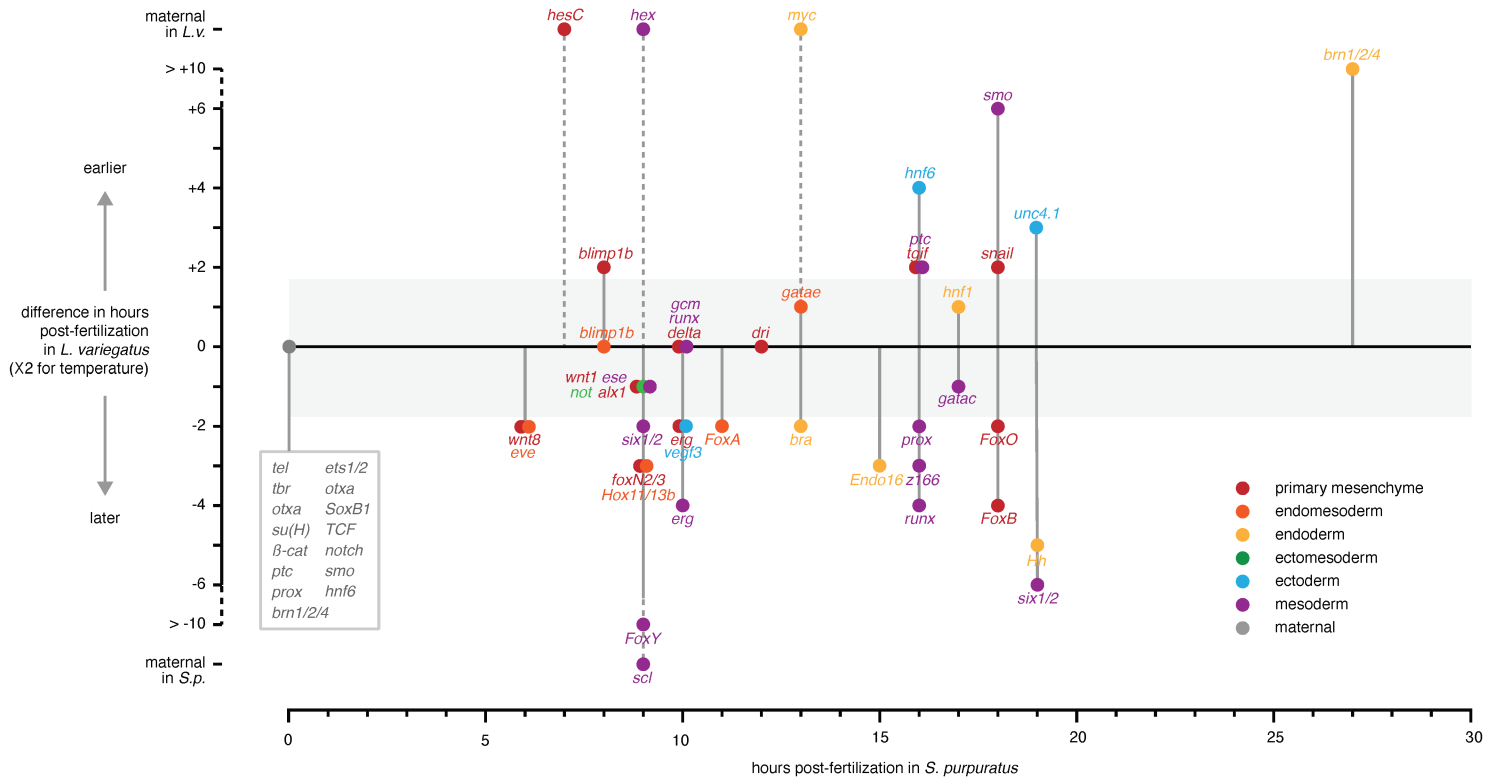

Source: https://www.biorxiv.org/content/10.1101/2020.11.12.380675v1.full.pdf
